# Supplementary material
Source: publisher figshare collection journal article supplement (https://sage.figshare.com/ndownloader/files/13378238)
Supplement: Supplementary file 1 [file 13378238]

## Sheet: Sheet1
	Supplementary Table S2: Summary of targeted amplicon sequencing data for OSCC
		Mapped reads (K)	Reads on target (%)	Coverage depth	Uniformity (%)	1x Coverage (%)	20x Coverage (%)	100x Coverage (%)	500x Coverage (%)
	Cell line	268	94.3	1129.9	96.2	99.4	99.3	98.1	75.4
	（n=18）	(112-554)	(88-94)	(486-2289)	(92-99)	(95-100)	(94-100)	(93-100)	(39-98)
	FFPE	251	89.1	940.6	88.3	100	98.5	90.9	54.8
	（n=38）	(65-689)	(76-98)	(260-2575)	(75-98)	(99-100)	(80-100)	(51-100)	(12-98)
	Frozen	327	95.6	1493.4	96.4	100	100	99.6	93.9
	（n=42）	(184-481)	(80-99)	(817-2191)	(91-99)	-100	-100	(99-100)	(84-98)
	All values are average calculations. The minimum and maximum values are also indicated.
